# Supplementary material for: GWAS for Starch-Related Parameters in Japonica Rice (Oryza sativa L.)
Source: MDPI journal article supplement (doi:10.3390/plants8080292), 2019-08-19
Supplement: s1 [file s1]

**A**

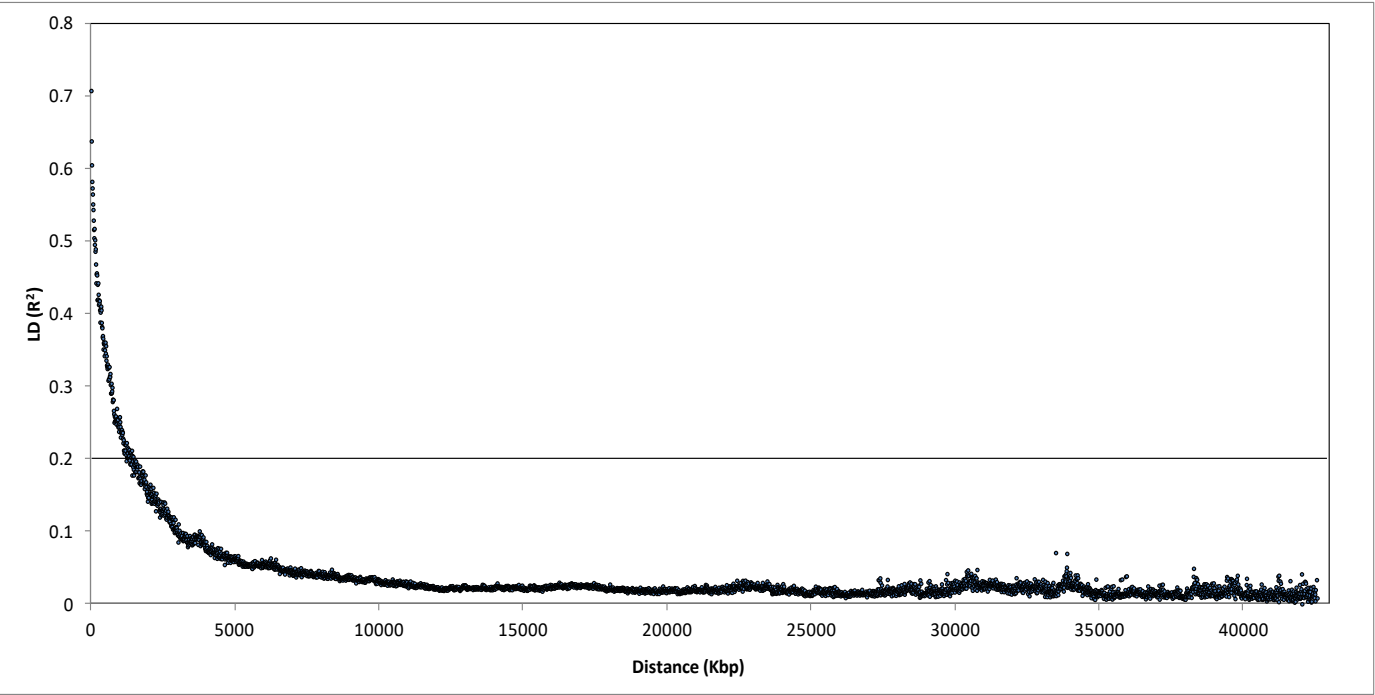

**B**

| Chromosome | LD decay (kbp) |
|------------|----------------|
| 1          | 765            |
| 2          | 875            |
| 3          | 1,315          |
| 4          | 1,845          |
| 5          | 1,545          |
| 6          | 845            |
| 7          | 1,555          |
| 8          | 1,585          |
| 9          | 975            |
| 10         | 1,835          |
| 11         | 415            |
| 12         | 1,405          |
| avg        | 1,247          |

**Figure S3.** Analysis of the mean LD decay. **A** Mean LD ( $R^2$ ) as a function of marker physical distance in the panel of the 115 rice accessions utilized in this study. The horizontal red line shows the critical  $R^2$  level between linked markers. **B** Summary of the mean LD decay calculated for each chromosome.
