# Supplementary material for: GWAS for Starch-Related Parameters in Japonica Rice (Oryza sativa L.)
Source: MDPI journal article supplement (doi:10.3390/plants8080292), 2019-08-19
Supplement: s1 [file s1]

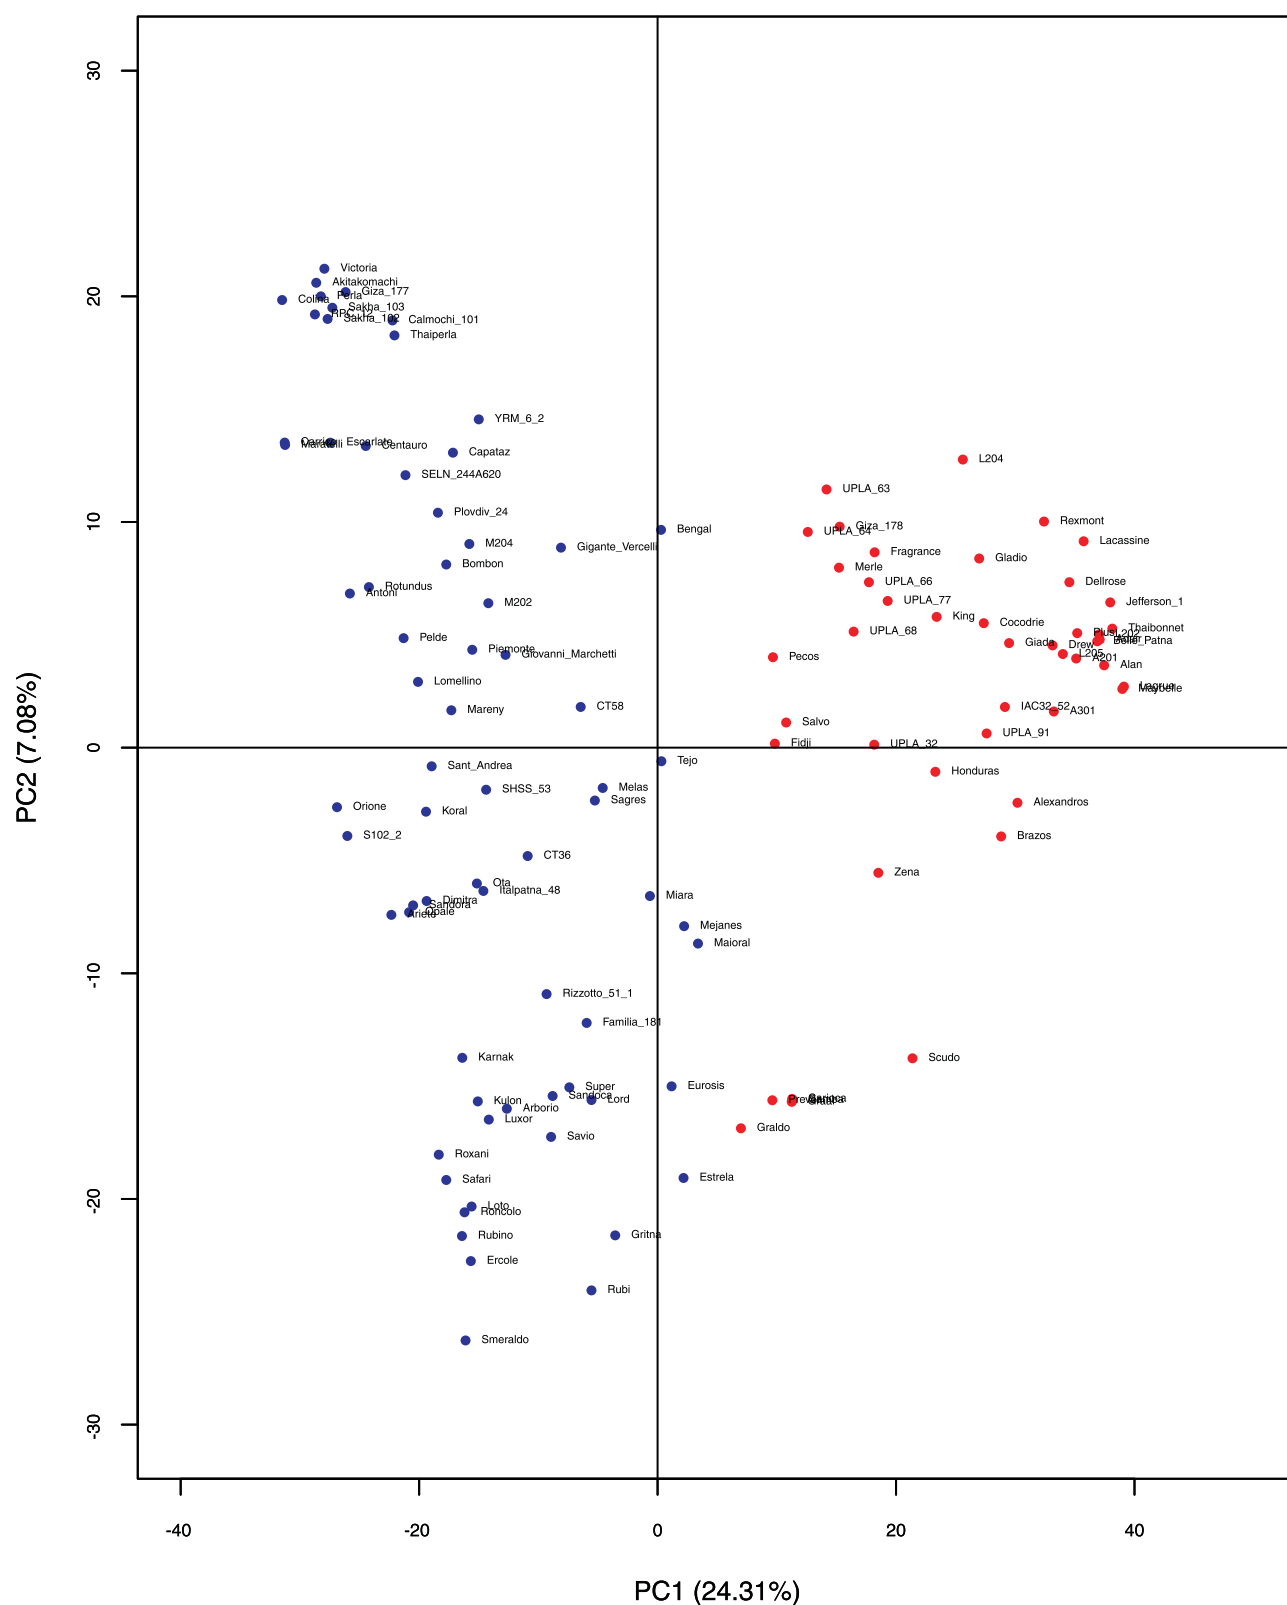

**Figure S2.** Principal component analysis (PCA) of the rice panel used in the present study. Point colours correspond to the two different taxonomic groups: blue = temperate *japonica*; red = tropical *japonica*.
