# Supplementary material for: GWAS for Starch-Related Parameters in Japonica Rice (Oryza sativa L.)
Source: MDPI journal article supplement (doi:10.3390/plants8080292), 2019-08-19
Supplement: s1 [file s1]

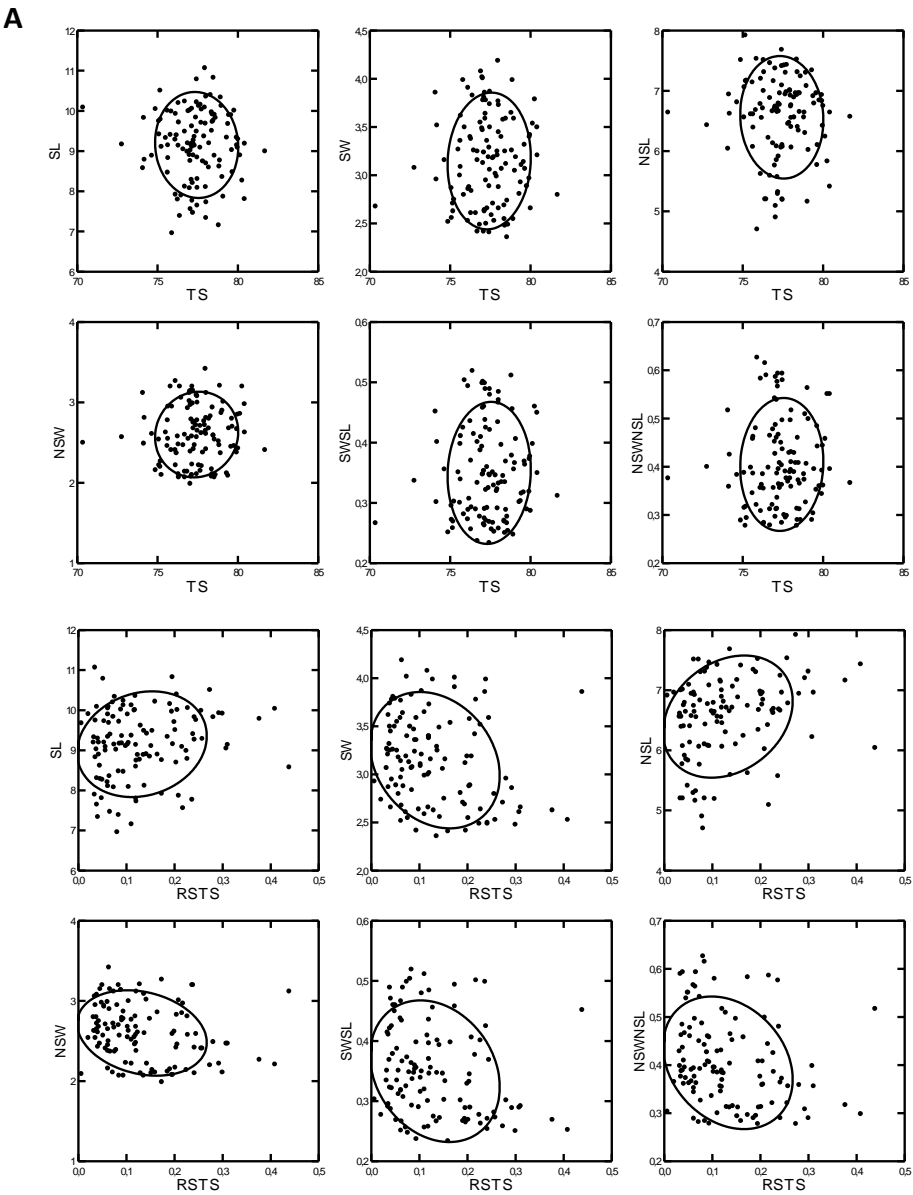

**Figure S1.** Correlation between TS or RSTS and grain shape-related traits. **A** Scatterplots of TS or RSTS and grain shape-related traits, representing the bivariate distribution for each pair of traits (Trait 1 and Trait 2). Confidence ellipses mark confidence limit for each distribution ( $P = 0.95$ ). **B** Pearson's correlation coefficients ( $R$ ) for each pair of traits. P-values are also reported. TS = total starch; RSTS = ratio between resistant starch (RS) and TS; SL = seed length; SW = seed width; NSL = naked seed length; NSW = naked seed width; SWSL = ratio between SW and SL; NSWNSL = ratio between NSW and NSL.

**B**

| Trait 1 | Trait 2 | R      | p-value |
|---------|---------|--------|---------|
| TS      | SL      | -0.044 | 0.641   |
| TS      | NSL     | -0.044 | 0.637   |
| TS      | SW      | 0.055  | 0.563   |
| TS      | NSW     | 0.060  | 0.523   |
| TS      | SWSL    | 0.049  | 0.603   |
| TS      | NSWNSL  | 0.046  | 0.623   |
| RSTS    | SL      | 0.156  | 0.095   |
| RSTS    | NSL     | 0.252  | 0.007   |
| RSTS    | SW      | -0.228 | 0.014   |
| RSTS    | NSW     | -0.225 | 0.016   |
| RSTS    | SWSL    | -0.222 | 0.017   |
| RSTS    | NSWNSL  | -0.251 | 0.007   |
